# Supplementary material
Source: PubMed Central journal article supplement (PMC1100744)

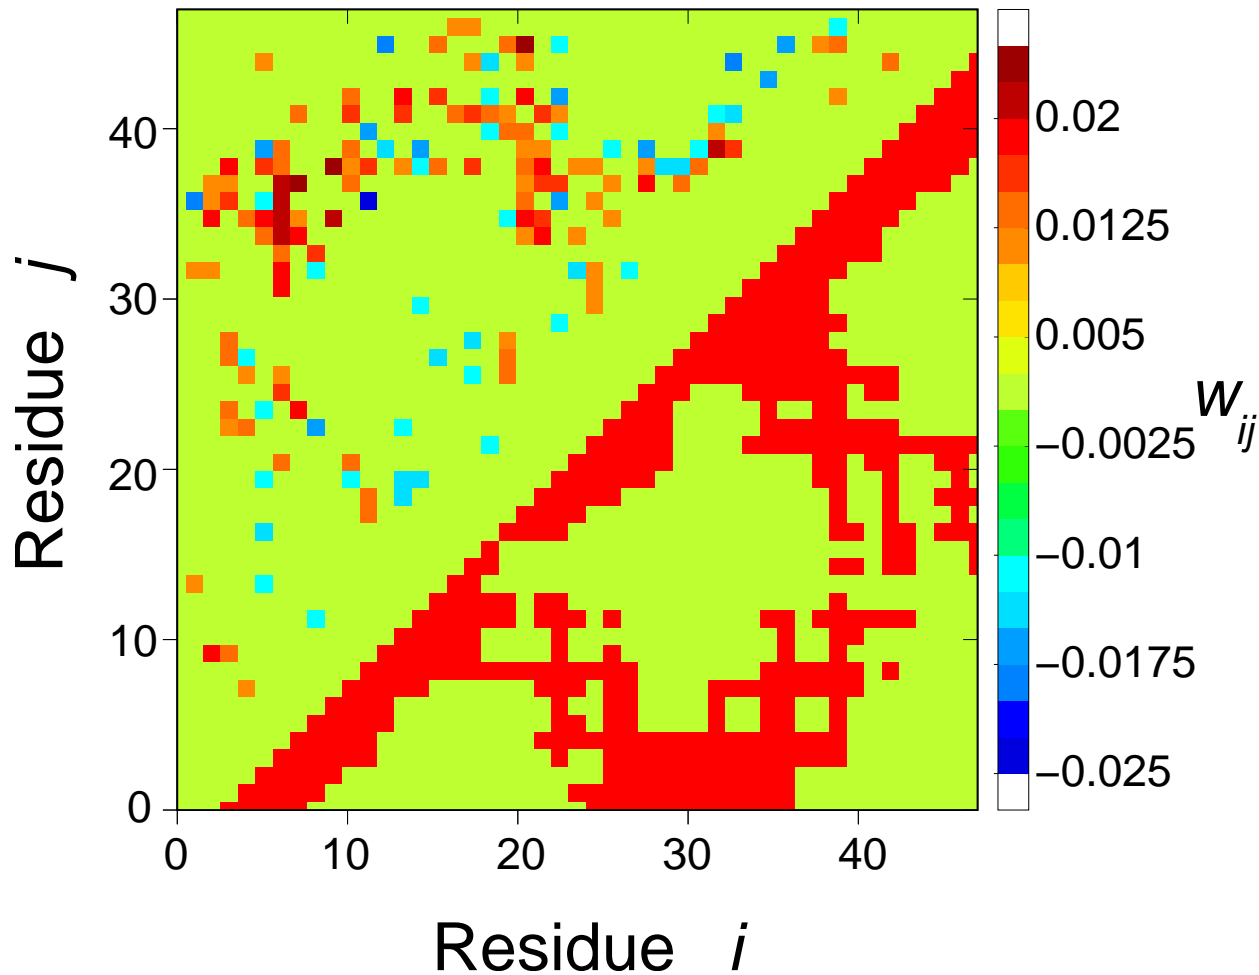

Supplement: pnas_102_19_6732__1.pdf [file pnas_102_19_6732__1.pdf]

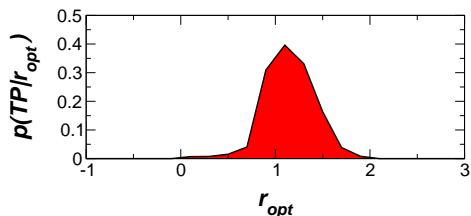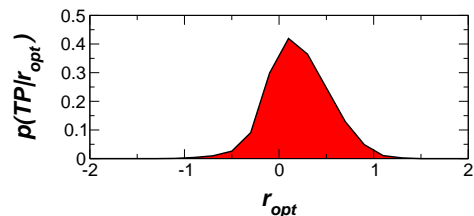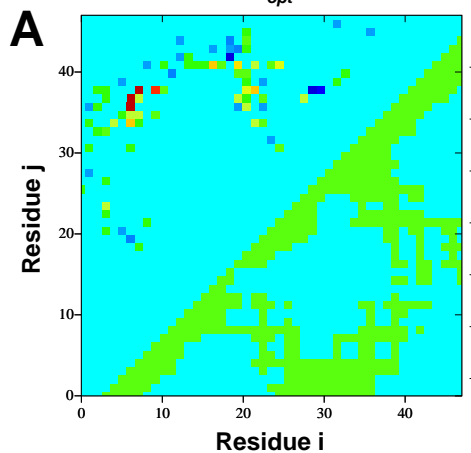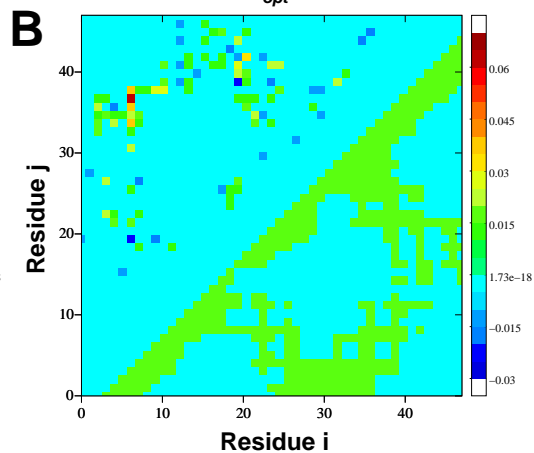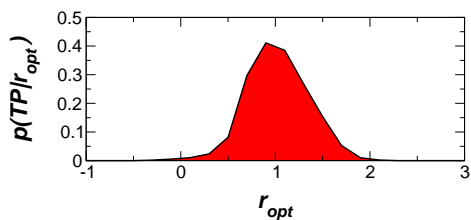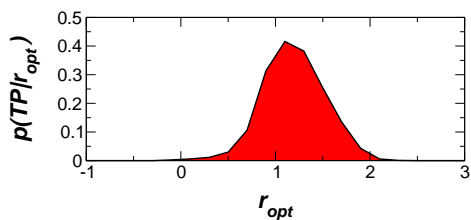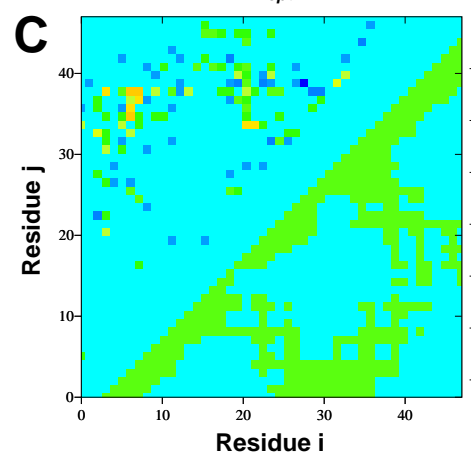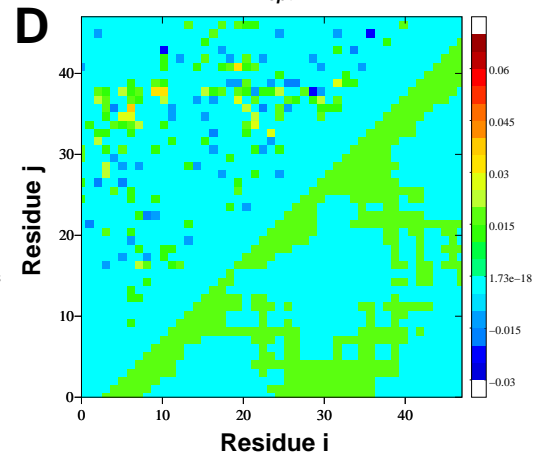

Supplement: pnas_102_19_6732__2.pdf [file pnas_102_19_6732__2.pdf]
